# Supplementary material for: Perphenazine And Prochlorperazine Decrease Glioblastoma Cells Migration And Invasion: Analysis of ABCB1 And ABCG2 Transporters, e-cadherin, α-tubulin, And Integrins (α3, α5, and β1) Expression in U87-MG Cells
Source: Research Square preprint supplement (doi:10.21203/rs.3.rs-876503/v1), 2021-09-20
Supplement: Supplementary file 1 [file 03f039ee89bdf139aa8cfb4c.xlsx]

## Sheet: transwell migration
					cells seeded				25000
					multiplication factor				1
					for SF N used cal curve y=30081,94x-1839,97
					for SF SF used cal curve y=43899,28x-3071,53
					amount of cells							amount of cells							amount of cells
	insert	well	A	A-blank		% cells				A	A-blank		% cells				A	A-blank		% cells
	SF (medium without serum)	N (growth medium with serum)	0.3885	0.3465	8583.42	34.3337				0.3926	0.3509	8715.78	34.8631				0.3937	0.353	8778.95	35.1158
	SF	SF	0.1256	0.0836	598.45	2.3938				0.1173	0.0756	247.256	0.989022				0.125	0.0843	629.179	2.51672
	Bacytracin 2,5mM SF	N	0.3192	0.2772	6498.74	25.995				0.3111	0.2694	6264.1	25.0564				0.4045	0.3638	9103.84	36.4154
	Bacytracin 2,5mM SF	SF	0.122	0.08	440.412	1.76165				0.1214	0.0797	427.243	1.70897				0.1363	0.0956	1125.24	4.50096
	Perphenazine 0,5mM SF	N	0.2947	0.2527	5761.74	23.0469				0.258	0.2163	4666.75	18.667				0.2904	0.2497	5671.49	22.686
	Perphenazine 0,5mM SF	SF	0.124	0.082	528.211	2.11284				0.1126	0.0709	40.929	0.163716				0.1345	0.0938	1046.22	4.18489
	Prochlorperazine 0,5mM SF	N	0.3367	0.2947	7025.18	28.1007				0.3991	0.3574	8911.32	35.6453				0.3885	0.3478	8622.53	34.4901
	Prochlorperazine 0,5mM SF	SF	0.1503	0.1083	1682.76	6.73105				0.1592	0.1175	2086.64	8.34654				0.1631	0.1224	2301.74	9.20697
	SF	Prochlorperazine 0,5mM N	0.1281	0.0861	750.085	3.00034				0.1322	0.0905	882.446	3.52978				0.1207	0.08	566.585	2.26634
	SF	Prochlorperazine 0,5mM SF	0.179	0.137	2942.67	11.7707				0.1922	0.1505	3535.31	14.1412				0.1727	0.132	2723.17	10.8927
	SF	Perphenazine 0,5mM N	0.1288	0.0868	771.142	3.08457				0.1095	0.0678	199.586	0.798342				0.1281	0.0874	789.192	3.15677
	SF	Perphenazine 0,5mM SF	0.1507	0.1087	1700.32	6.80129				0.1556	0.1139	1928.6	7.71439				0.1779	0.1372	2951.45	11.8058
		BLANK	0.042							0.0417							0.0407
				mean		mean	SD
	insert	well	I	II	III
	SF (medium without serum)	N (growth medium with serum)	34.3337	34.8631	35.1158	34.7709	0.399142
	SF	SF	2.3938	0.989022	2.51672	1.96651	0.84876
	Bacytracin 2,5mM SF	N	25.995	25.0564	36.4154	29.1556	6.30464
	Bacytracin 2,5mM SF	SF	1.76165	1.70897	4.50096	2.65719	1.59697
	Perphenazine 0,5mM SF	N	23.0469	18.667	22.686	21.4666	2.43126
	Perphenazine 0,5mM SF	SF	2.11284	0.163716	4.18489	2.15382	2.0109
	Prochlorperazine 0,5mM SF	N	28.1007	35.6453	34.4901	32.7454	4.06364
	Prochlorperazine 0,5mM SF	SF	6.73105	8.34654	9.20697	8.09485	1.257
	SF	Prochlorperazine 0,5mM N	3.00034	3.52978	2.26634	2.93215	0.634475
	SF	Prochlorperazine 0,5mM SF	11.7707	14.1412	10.8927	12.2682	1.68045
	SF	Perphenazine 0,5mM N	3.08457	0.798342	3.15677	2.34656	1.34128
	SF	Perphenazine 0,5mM SF	6.80129	7.71439	11.8058	8.77383	2.66516
	Po odjęciu kontroli negatywnej SF do SF
				mean		mean	SD
	insert	well	I	II	III
	SF (medium without serum)	N (growth medium with serum)	31.9399	33.8741	32.5991	32.8044	0.983311
	Bacytracin 2,5mM SF	N	24.2333	23.3474	31.9144	26.4984	4.71127
	Perphenazine 0,5mM SF	N	20.9341	18.5033	18.5011	19.3128	1.40407
	Prochlorperazine 0,5mM SF	N	21.3697	27.2987	25.2831	24.6505	3.01473

## Sheet: transwell invasion
					cells seeded				25000
					multiplication factor				1
					for SF N used cal curve y=30081,94x-1839,97
					for SF SF used cal curve y=43899,28x-3071,53
					amount of cells							amount of cells							amount of cells
	insert	well	A	A-blank		% cells				A	A-blank		% komórek				A	A-blank		% komórek
	SF (medium without serum)	N (growth medium with serum)	0.4178	0.3758	9464.82	37.8593				0.3839	0.3422	8454.07	33.8163				0.347	0.3063	7374.13	29.4965
	SF	SF	0.1253	0.0833	585.28	2.34112				0.1286	0.0869	743.317	2.97327				0.1268	0.0861	708.198	2.83279
	Bacytracin 2,5mM SF	N	0.2687	0.2267	4979.61	19.9184				0.3109	0.2692	6258.09	25.0324				0.3185	0.2778	6516.79	26.0672
	Bacytracin 2,5mM SF	SF	0.2049	0.1629	4079.66	16.3187				0.2077	0.166	4215.75	16.863				0.1879	0.1472	3390.44	13.5618
	Perphenazine 0,5mM SF	N	0.3745	0.3325	8162.28	32.6491				0.2982	0.2565	5876.05	23.5042				0.3196	0.2789	6549.88	26.1995
	Perphenazine 0,5mM SF	SF	0.1612	0.1192	2161.26	8.64506				0.1479	0.1062	1590.57	6.36229				0.1577	0.117	2064.69	8.25874
	Prochlorperazine 0,5mM SF	N	0.316	0.274	6402.48	25.6099				0.2608	0.2191	4750.98	19.0039				0.276	0.2353	5238.31	20.9532
	Prochlorperazine 0,5mM SF	SF	0.1293	0.0873	760.877	3.04351				0.1281	0.0864	721.368	2.88547				0.129	0.0883	804.776	3.21911
	SF	Prochlorperazine 0,5mM N	0.126	0.084	686.913	2.74765				0.1404	0.0987	1129.12	4.51647				0.1278	0.0871	780.167	3.12067
	SF	Prochlorperazine 0,5mM SF	0.1561	0.1141	1937.38	7.74951				0.1729	0.1312	2688.06	10.7522				0.1687	0.128	2547.58	10.1903
	SF	Perphenazine 0,5mM N	0.1147	0.0727	346.987	1.38795				0.1248	0.0831	659.839	2.63936				0.1247	0.084	686.913	2.74765
	SF	Perphenazine 0,5mM SF	0.1576	0.1156	2003.23	8.01291				0.149	0.1073	1638.86	6.55545				0.1705	0.1298	2626.6	10.5064
		BLANK	0.042							0.0417							0.0407
				mean		mean	SD
	insert	well	I	II	III
	SF (medium without serum)	N (growth medium with serum)	37.8593	33.8163	29.4965	33.724	4.18215
	SF	SF	2.34112	2.97327	2.83279	2.71573	0.331936
	Bacytracin 2,5mM SF	N	19.9184	25.0324	26.0672	23.6726	3.29217
	Bacytracin 2,5mM SF	SF	16.3187	16.863	13.5618	15.5811	1.76988
	Perphenazine 0,5mM SF	N	32.6491	23.5042	26.1995	27.4509	4.69913
	Perphenazine 0,5mM SF	SF	8.64506	6.36229	8.25874	7.75536	1.2218
	Prochlorperazine 0,5mM SF	N	25.6099	19.0039	20.9532	21.8557	3.3942
	Prochlorperazine 0,5mM SF	SF	3.04351	2.88547	3.21911	3.04936	0.166894
	SF	Prochlorperazine 0,5mM N	2.74765	4.51647	3.12067	3.4616	0.932391
	SF	Prochlorperazine 0,5mM SF	7.74951	10.7522	10.1903	9.56401	1.59632
	SF	Perphenazine 0,5mM N	1.38795	2.63936	2.74765	2.25832	0.755706
	SF	Perphenazine 0,5mM SF	8.01291	6.55545	10.5064	8.35825	1.99798
	after subtracting the negative control (SF to SF)
				mean		mean	SD
	insert	well	I	II	III
	SF (medium without serum)	N (growth medium with serum)	35.5182	30.843	26.6637	31.0083	4.42954
	Bacytracin 2,5mM SF	N	3.59977	8.16935	12.5054	8.09151	4.45332
	Perphenazine 0,5mM SF	N	24.004	17.1419	17.9408	19.6956	3.75256
	Prochlorperazine 0,5mM SF	N	22.5664	16.1185	17.7341	18.8063	3.35503

## Sheet: migration and invasion analysis
	control				bacytracin				perphenazine				prochlorperazine
concentration					2,5 mM				0,5 M				0,5 M
	without geltrex		with geltrex		without geltrex		with geltrex		without geltrex		with geltrex		without geltrex		with geltrex
	% migration	SD	% invasion	SD	% migration	SD	% invasion	SD	% migration	SD	% invasion	SD	% migration	SD	% invasion	SD
with FBS	34.7709	0.399142	33.724	4.18215	29.1556	6.30464	23.6726	3.29217	21.4666	2.43126	27.4509	4.69913	32.7454	4.06364	21.8557	3.3942
without FBS	1.96651	0.84876	2.71573	0.331936	2.65719	1.59697	15.5811	1.76988	2.15382	2.0109	7.75536	1.2218	8.09485	1.257	3.04936	0.166894
